# Supplementary material for: BMP6/TAZ-Hippo signaling modulates angiogenesis and endothelial cell response to VEGF
Source: Springer Nature journal article supplement (doi:10.1007/s10456-020-09748-4), 2020-10-06
Supplement: MOESM1 [file 18453862]

**Article title: BMP6/TAZ-Hippo signaling modulates angiogenesis and endothelial cell response to VEGF**

**Journal: Angiogenesis**

**Authors:** Pulkkinen HH<sup>1\*</sup>, Kiema M. <sup>1\*</sup>, Lappalainen JP<sup>1,2</sup>, Toropainen A<sup>1</sup>, Beter M.<sup>1</sup>, Tirronen A<sup>1</sup>, Holappa L<sup>1</sup>, Niskanen H<sup>1</sup>, Kaikkonen MU<sup>1</sup>, Ylä-Herttuala S<sup>1,3,4\*</sup> and Laakkonen JP<sup>1\*</sup>.

**Affiliations:** <sup>1</sup>A.I. Virtanen Institute for Molecular Sciences, University of Eastern Finland, Kuopio, Finland, <sup>2</sup> Department of Clinical Chemistry, University of Eastern Finland and Eastern Finland Laboratory Centre, <sup>3</sup> Science Service Center, Kuopio University Hospital, Kuopio, Finland, and <sup>4</sup> Gene Therapy Unit, Kuopio University Hospital, Kuopio, Finland, \*equal contribution

**Address correspondence:** Johanna Laakkonen PhD., A.I. Virtanen Institute for Molecular Sciences, University of Eastern Finland, Kuopio, Finland, [johanna.p.laakkonen@uef.fi](mailto:johanna.p.laakkonen@uef.fi), +358503058453, ORCID: 0000-0002-8556-9727

---

## SUPPLEMENTAL FILES

This document includes following material:

1. **Supplemental Methods**
2. **Supplemental Tables: NGS Experiments A-E**
3. **Supplemental Tables: Major Resources Tables**
4. **Supplemental References**

## 1. SUPPLEMENTAL METHODS

**RNA-Seq Libraries & NGS experiments.** Tissue sample collection, tissue homogenization and RNA extraction were done in a similar way as for RT-qPCR experiments. After enrichment by Poly(A)-RNA with MicroPoly(A) Purist Kit, RNA was fragmented using RNA Fragmentation Reagents (Life Technologies) and purified in P-30 column (Bio-Rad, Hercules, CA). Fragmented RNA was further dephosphorylated with PNK (New England Biolabs), heat-inactivated and purified by RNA Clean & Concentrator™-5 kit (Zymo Research Corporation). Poly(A)-tailing and cDNA synthesis was performed as described previously <sup>1</sup>. For reverse transcription an oligo allowing custom barcoding during final amplification was used: /5Phos/GATCGTCGGACTGTAGAACTCTGAAC/iSp18/TCAGACGTGTGCTCTTCCGATCTTTTTTTTTTTTTTTTTTTTTTTVN (IDT, Coralville, IA). Exonuclease I (New England Biolabs) was used to catalyze the removal of excess oligo. The DNA-RNA hybrid was further purified using ChIP DNA clean & Concentrator Kit (Zymo Research Corporation), RNaseH treated and circularized using CircLigase (Epicentre). The libraries were amplified for 10 cycles using the following primers: 5'-AATGATACGGCGACCACCGACAGGTTTCAGAGTTCTACAGTCCGACG-3' and 5'-CAAGCAGAAGACGGCATAACGAGATXXXXXXGTGACTGGAGTTTCAGACGTGTGCTCTTCCGATCT (barcode XXXXXX-underlined). The final product was ran on Novex 10%-TBE gel, purified and cleaned-up as above. The libraries were sequenced on HiSeq 2000 (Illumina, San Diego, CA) for 50 cycles according to the manufacturer's instructions (GeneCore, EMBL). RNA-Seq data pre-processing and analysis was performed as described in <sup>2</sup>. Each sequencing experiment was normalized to a total of 10<sup>7</sup> uniquely mapped tags and visualized by preparing custom tracks for the UCSC Genome browser. Differentially expressed genes were identified using edgeR <sup>3</sup>.

Raw data for H3K27ac ChIP-Seq (ENCSR000CDH) was processed as described in <sup>2</sup> and peak detection was performed with HOMER 4.7 findPeaks.pl program using -histone and -nfr options. Those H3K27ac peaks that were detected in two replicate datasets were selected for analysis. To further narrow the regions to detect motifs for putative regulatory factors, we used DNase I hypersensitive sites detected from 8-week old mouse liver (downloaded from UCSC Table Browser) and selected those found in two replicate datasets and overlapping with H3K27ac peaks. Finally, those DNase I hypersensitive sites found within promoters (within 3kb from TSS) of differentially regulated genes or at distal regulatory sites (at least 3kb from nearest TSS, but within 100 kb from differentially regulated gene) were used to search for motifs for regulatory factors. Motif enrichment analysis was performed with HOMER findMotifsGenome.pl program.

Mice RNA-Seq data is available in NCBI Gene Expression Omnibus under accession number GSE82106. A summary of the NGS samples used in the analysis and lists of genes in heatmaps are found in Supplemental files: NGS experiments A-E.

SUPPLEMENTAL FILES: NGS EXPERIMENTS

A. SUMMARY OF THE SAMPLES USED IN SEQUENCING EXPERIMENTS AND ANALYSIS

SAMPLES

|                                    |
|------------------------------------|
| mouse_liver-RNA-Seq-AdCMV1         |
| mouse_liver-RNA-Seq-AdCMV2         |
| mouse_liver-RNA-Seq-AdCMV3         |
| mouse_liver-RNA-Seq-AdCMV4         |
| mouse_liver-RNA-Seq-AdCMV5         |
| mouse_liver-RNA-Seq-AdVEGF1        |
| mouse_liver-RNA-Seq-AdVEGF2        |
| mouse_liver-RNA-Seq-AdVEGF3        |
| mouse_liver-RNA-Seq-AdVEGF4        |
| mouse_liver-RNA-Seq-AdVEGF5        |
| Pig_GroSeq_healthy_1               |
| Pig_GroSeq_healthy_2               |
| Pig_GroSeq_healthy_3               |
| Pig_GroSeq_border_1                |
| Pig_GroSeq_border_2                |
| Pig_GroSeq_border_3 genes          |
| Pig_GroSeq_ischemic_1              |
| Pig_GroSeq_ischemic_2              |
| Pig_GroSeq_ischemic_3 genes        |
| HUVEC GRO-seq normoxia replicate 1 |
| HUVEC GRO-seq normoxia replicate 2 |
| HUVEC GRO-seq normoxia replicate 3 |
| HUVEC GRO-seq normoxia replicate 4 |
| HUVEC GRO-seq hypoxia replicate 1  |
| HUVEC GRO-seq hypoxia replicate 2  |
| HUVEC GRO-seq hypoxia replicate 3  |
| HUVEC GRO-seq hypoxia replicate 4  |

B. GO ANALYSIS: SELECTED VEGF-INDUCED CELLULAR PROCESSES AND SIGNALING PATHWAYS  
LIVER, i.v. AdVEGF gene transfer, 6d, C57/Bl6 mice

CELLULAR PROCESSES

| TermID     | Term                                         | Enrichment | logP   | Genes in Term | Target Genes in Term | Total Target Genes | Gene Symbols                                                                                                                                                                                                                                                                                                                                                                                                                                                                                                                                                                                                                                                                                                          |
|------------|----------------------------------------------|------------|--------|---------------|----------------------|--------------------|-----------------------------------------------------------------------------------------------------------------------------------------------------------------------------------------------------------------------------------------------------------------------------------------------------------------------------------------------------------------------------------------------------------------------------------------------------------------------------------------------------------------------------------------------------------------------------------------------------------------------------------------------------------------------------------------------------------------------|
| GO:0001525 | angiogenesis                                 | 5.30E-28   | -62.81 | 277           | 76                   | 1036               | TEK, DLL4, ID1, HSPG2, COL4A2, MMRN2, KDR, MFGE8, CD34, HAND2, RASIP1, VASH1, NRXN1, TAL1, PDGFA, ENG, NFATC4, JAG1, CTGF, ITGB3, COL4A1, DAB2IP, TBX20, RAPGEF3, TIE1, ADRA2B, PDGFRB, PLCD1, RAMP2, JAM3, SEMA5A, EDNRA, NRARP, PGF, APOLD1, CCBE1, FLT1, PLXND1, ANXA2, NRP1, ESM1, LAMA5, GJA5, HEY1, EFN2, STAB2, ECSCR, ACKR3, COL8A1, EGFL7, TGFB2, ETS1, SRPX2, BMPER, E2F7, PTPRB, MCAM, FLT4, MMP2, GDF2, SOX17, ANGPT2, NOS3, CSPG4, VEGFC, VAV3, ELK3, NOTCH4, CALCR1, HOXB3, ROBO4, CXCR4, GPR124, ACVRL1, PIK3R6, SOX18                                                                                                                                                                                 |
| GO:0016477 | cell migration                               | 3.38E-16   | -35.62 | 659           | 101                  | 1036               | TEK, AMOTL1, ID1, HBEGF, KDR, CD248, GIPC1, HAND2, DDR1, PDGFB, PLAT, SEMA6A, ENG, ESAM, TGFB3, CTGF, ITGB3, COL5A1, DAB2IP, TBX20, TIAM1, PDGFRB, FMNL3, MARK1, COL1A1, LRRK2, SEMA3F, VANGL2, JAM3, GPC6, SEMA5A, MDK, FYN, BAMBI, PTK7, FLT1, LAMB1, KITLG, CXCL14, PLXND1, ARC, NRP1, LAMA5, MEF2C, EFN2, CTHRC1, JUP, SEMA4C, CD63, ITGA6, EPS8, OPHN1, PECAM1, TGFB2, EFN1, SLC7A6, PLEKHG5, IL16, SPP1, CCL24, NAV1, GLI3, TNFAIP1, APBB2, SRGAP1, PRKG1, EDNRB, NTN1, ITGA9, SOX17, PF4, CCDC88A, ANGPT2, CSPG4, NOS3, VEGFC, TGFB1, TRPM4, ABI2, PPP1R9B, HES1, VAV3, PODXL2, LAMC1, SNAI1, ADAMTS12, RELN, ELANE, PEAK1, CDK5R1, NR2F1, CXCR4, GPR124, FSCN1, PKN3, ACVRL1, HOXA5, NDN, SOX18, COL1A2, CD34 |
| GO:0010594 | regulation of endothelial cell migration     | 1.02E-13   | -29.91 | 88            | 29                   | 1036               | TEK, VEGFC, TGFB1, ANXA3, DLL4, AMOTL1, MMRN2, PTPRM, KDR, BMP10, VASH1, PDGFB, ETS1, SRPX2, SEMA5A, HDAC9, ZNF580, BMPER, FLT4, ACVRL1, GPR124, CCBE1, KLF4, HDAC7, ITGB3, DAB2IP, GDF2, NRP1, ANGPT2                                                                                                                                                                                                                                                                                                                                                                                                                                                                                                                |
| GO:0001936 | regulation of endothelial cell proliferation | 1.01E-07   | -16.11 | 86            | 21                   | 1036               | TEK, PTPRM, KDR, VASH1, PDGFB, BMP6, SEMA5A, ZNF580, NRARP, BMP2, ENG, PGF, CCL24, FLT4, ACVRL1, ITGB3, GDF2, EGFL7, NRP1, VASH2, CAV2                                                                                                                                                                                                                                                                                                                                                                                                                                                                                                                                                                                |
| GO:0001837 | epithelial to mesenchymal transition         | 8.19E-05   | -9.41  | 51            | 12                   | 1036               | TGFB1, BMP2, HEY2, MSX1, TGFB3, HEYL, SNAI1, FLNA, TGFB2, LOXL3, FAM101B, HEY1                                                                                                                                                                                                                                                                                                                                                                                                                                                                                                                                                                                                                                        |
| GO:0001955 | blood vessel maturation                      | 1.02E-03   | -6.89  | 8             | 4                    | 1036               | ACVRL1, CDH5, LYL1, MMP2                                                                                                                                                                                                                                                                                                                                                                                                                                                                                                                                                                                                                                                                                              |
| GO:0006955 | immune response                              | 8.15E-21   | -46.26 | 1146          | 75                   | 315                | CLEC4E, PTAFR, AK7, CCL2, SLAMF7, CD274, CCL5, CD1D, GBP5, PSMB8, SOCS1, HLA-DQB1, GBP2, IL1RN, IFIT1, ZBP1, C2, TLR5, IFNG, RIPK2, USP18, SLC26A6, SOCS3, CXCL10, TAPBP, UBD, CFD, STAT1, IRF7, HLA-DRB5, GBP6, CD276, HLA-F, CXCL3, CD3G, CXCL2, IRGM, CD27, ICAM1, HLA-A, CD180, PDCD1, UBE2L6, SLA2, CCL4, AQP4, PYCARD, PRF1, ITK, IL7, RORC, TNF, TNFAIP3, HLA-DOA1, VNN1, CST7, IFIT3, CD74, ISG15, CIITA, FAS, PSMB10, TLR2, CD8A, RSAD2, SEMA4D, CAMK2B, NFIL3, NLR3, LY75, CCL13, CCL3L3, IRG1, CD28, IRF1                                                                                                                                                                                                  |
| GO:0033993 | response to lipid                            | 6.44E-07   | -14.26 | 646           | 33                   | 315                | PTAFR, NQO1, CCL2, WNT2, CCL5, GSTP1, ICAM1, SLC34A2, CD180, CYP1A1, SERPINA7, MAPK15, PYCARD, AQP4, IL1RN, CEBPE, TLR5, IFNG, RORC, TNF, CYP7A1, TNFAIP3, RIPK2, FAS, CXCL10, TLR2, CYP1A2, PTGDS, STAT1, AR, CMPK2, PTGES, IRG1                                                                                                                                                                                                                                                                                                                                                                                                                                                                                     |

SIGNALING PATHWAYS

| TermID     | Term                                                          | Enrichment | logP   | Genes in Term | Target Genes in Term | Total Target Genes | Gene Symbols                                                                                                                                                     |
|------------|---------------------------------------------------------------|------------|--------|---------------|----------------------|--------------------|------------------------------------------------------------------------------------------------------------------------------------------------------------------|
| GO:0007179 | transforming growth factor beta receptor signaling pathway    | 9.07E-06   | -11.61 | 129           | 23                   | 1036               | TGFB1, CDKN2B, ID1, SMAD9, TGIF2, SMAD7, EID2, TGFB2, PDGFB, COL3A1, PDGFA, ENG, FKBP1A, TGFB3, LTBP4, BAMBI, PMPA1, ACVRL1, WWTR1, TGFB3, COL1A2, SMAD6, PDGFRB |
| GO:0030509 | BMP signaling pathway                                         | 6.10E-05   | -9.70  | 65            | 14                   | 1036               | ENG, BMP2, MSX1, ID1, TGFB3, FSTL1, SMAD9, GDF6, ACVRL1, BMP10, SMAD7, GDF2, SMAD6, BMP6                                                                         |
| GO:0007219 | Notch signaling pathway                                       | 1.83E-04   | -8.61  | 126           | 20                   | 1036               | HES1, DLL4, SNAI1, NOTCH4, DTX3, JAG2, NLE1, APP, HDAC9, CCND1, BMP2, MDK, HEY2, EPN2, JAG1, HEYL, HDAC7, NOTCH3, MAML3, HEY1                                    |
| GO:0048010 | vascular endothelial growth factor receptor signaling pathway | 6.35E-04   | -7.36  | 24            | 7                    | 1036               | VEGFC, PGF, DAB2IP, NRP1, FLT4, KDR, FLT1                                                                                                                        |
| GO:0071526 | semaphorin-plexin signaling pathway                           | 1.76E-03   | -6.34  | 21            | 6                    | 1036               | PLXNA4, SEMA3F, PLXND1, NRP1, SEMA4C, SEMA6A                                                                                                                     |
| GO:0035329 | hippo signaling                                               | 5.64E-03   | -5.18  | 26            | 6                    | 1036               | TJP1, AMOTL1, FAT4, TEAD2, WWTR1, DCHS1                                                                                                                          |
| GO:0016055 | Wnt signaling pathway                                         | 2.03E-02   | -3.90  | 236           | 24                   | 1036               | TNIK, CTHRC1, AMOTL1, MARK1, JUP, WLS, WISP1, NXN, DACT3, HIC1, SOX4, VANGL2, DKK2, CCND1, TMEM88, DAB2, FRZB, PTK7, CDH3, TAX1BP3, CCDC88C, SOX17, RARG, TGFB11 |

C. DIFFERENTIALLY REGULATED GENES: TGF-beta/BMP SIGNALING  
LIVER, i.v. AdVEGF gene transfer, 6d, C57/Bl6 mice

| Transcript/RepeatID | Chr   | Strand | Symbol     | Description                                                                                     | AdCMV vs. AdVEGF logFC | AdCMV vs. AdVEGF FDR |
|---------------------|-------|--------|------------|-------------------------------------------------------------------------------------------------|------------------------|----------------------|
| NM_001277259        | chr15 | +      | Alk1/Acr11 | activin A receptor, type II-like 1                                                              | 1.28                   | 1.7E-08              |
| NM_175501           | chr15 | +      | Adams12    | a disintegrin-like and metalloproteinase (reprolysin type) with thrombospondin type 1 motif, 12 | 2.50                   | 8.3E-13              |
| NM_026505           | chr18 | +      | Bambi      | BMP and activin membrane-bound inhibitor                                                        | 1.45                   | 3.9E-07              |
| NM_007553           | chr2  | +      | Bmp2       | bone morphogenetic protein 2                                                                    | 1.70                   | 2.1E-13              |
| NM_007556           | chr13 | +      | Bmp6       | bone morphogenetic protein 6                                                                    | 2.07                   | 3.0E-04              |
| NM_019506           | chr14 | +      | Bmp9/Gdf2  | growth differentiation factor 2                                                                 | 1.03                   | 7.7E-05              |
| NM_009756           | chr6  | +      | Bmp10      | bone morphogenetic protein 10                                                                   | 1.81                   | 1.7E-02              |
| NM_013526           | chr4  | +      | Bmp13/Gdf6 | growth differentiation factor 6                                                                 | 1.14                   | 2.5E-02              |
| NM_028472           | chr9  | +      | Bmper      | BMP-binding endothelial regulator                                                               | 1.31                   | 1.4E-02              |
| NM_016900           | chr6  | +      | Cav2       | caveolin 2                                                                                      | 1.46                   | 4.3E-10              |
| NM_153098           | chr9  | +      | Cd109      | CD109 antigen                                                                                   | 6.72                   | 2.9E-12              |
| NM_007670           | chr4  | -      | Cdkn2b     | cyclin dependent kinase inhibitor 2B                                                            | 1.92                   | 2.1E-03              |
| NM_007742           | chr11 | +      | Col1a1     | collagen, type I, alpha 1                                                                       | 3.15                   | 2.8E-18              |
| NM_007743           | chr6  | +      | Col1a2     | collagen, type I, alpha 2                                                                       | 3.02                   | 5.2E-20              |
| NM_009930           | chr1  | +      | Col3a1     | collagen, type III, alpha 1                                                                     | 2.67                   | 9.3E-24              |
| NM_009932           | chr8  | +      | Col4a2     | collagen, type IV, alpha 2                                                                      | 2.71                   | 5.9E-30              |
| NM_001037905        | chr15 | +      | Dab2       | disabled 2, mitogen-responsive phosphoprotein                                                   | 1.49                   | 1.9E-16              |
| NM_198425           | chr7  | +      | Eid2       | EP300 interacting inhibitor of differentiation 2                                                | 2.01                   | 2.8E-05              |
| NM_001146350        | chr2  | +      | Eng        | endoglin                                                                                        | 1.42                   | 9.8E-14              |
| NM_007993           | chr2  | -      | Fbn1       | fibrillin 1                                                                                     | 2.49                   | 4.6E-28              |
| NM_008019           | chr2  | +      | Fkbp1a     | FK506 binding protein 1a                                                                        | 1.11                   | 1.6E-06              |
| NM_008047           | chr16 | +      | Fstl1      | folliculin-like 1                                                                               | 2.67                   | 4.4E-32              |
| NM_018771           | chr8  | +      | Gipc1      | GIPC PDZ domain containing family, member 1                                                     | 1.37                   | 1.1E-10              |
| NM_008235           | chr16 | +      | Hes1       | hes family bHLH transcription factor 1                                                          | 1.79                   | 5.7E-14              |
| NM_013905           | chr4  | +      | Heyl       | hairy/enhancer-of-split related with YRPW motif-like                                            | 3.48                   | 1.9E-31              |
| NM_019564           | chr7  | +      | Htra1      | HtrA serine peptidase 1                                                                         | 1.22                   | 1.5E-02              |
| NM_030127           | chr5  | -      | Htra3      | HtrA serine peptidase 3                                                                         | 1.53                   | 1.3E-02              |
| NM_010495           | chr2  | +      | Id1        | inhibitor of DNA binding 1                                                                      | 2.46                   | 3.9E-28              |
| NM_001001309        | chr2  | -      | Itga8      | integrin alpha 8                                                                                | 1.68                   | 1.7E-08              |
| NM_001113549        | chr7  | -      | Ltbp4      | latent transforming growth factor beta binding protein 4                                        | 2.36                   | 1.0E-19              |
| NM_001291035        | chr11 | -      | Mapk7      | mitogen-activated protein kinase 7                                                              | 1.29                   | 1.5E-06              |
| NM_007963           | chr3  | -      | Mecom      | MDS1 and EVI1 complex locus                                                                     | 4.54                   | 4.8E-81              |
| NM_001170537        | chr13 | +      | Mef2c      | myocyte enhancer factor 2C                                                                      | 3.02                   | 3.7E-46              |
| NM_010835           | chr5  | -      | Msx1       | msh homeobox 1                                                                                  | 1.85                   | 1.5E-03              |
| NM_001109988        | chr18 | -      | Nrep       | neuronal regeneration related protein                                                           | 1.13                   | 6.2E-05              |
| NM_001243757        | chr7  | +      | Pde2a      | phosphodiesterase 2A, cGMP-stimulated                                                           | 1.69                   | 3.0E-21              |
| NM_018779           | chr6  | +      | Pde3a      | phosphodiesterase 3A, cGMP inhibited                                                            | 1.83                   | 9.0E-05              |
| NM_008808           | chr5  | -      | Pdgfa      | platelet derived growth factor, alpha                                                           | 1.62                   | 1.9E-14              |
| NM_011057           | chr15 | -      | Pdgfb      | platelet derived growth factor, B polypeptide                                                   | 2.28                   | 6.6E-12              |
| NM_008809           | chr18 | +      | Pdgfrb     | platelet derived growth factor receptor, beta polypeptide                                       | 1.82                   | 8.4E-17              |
| NM_001040611        | chr6  | +      | Peg10      | paternally expressed 10                                                                         | 2.85                   | 6.3E-13              |
| NM_022995           | chr2  | -      | Pmepa1     | prostate transmembrane protein, androgen induced 1                                              | 1.62                   | 4.9E-15              |
| NM_008542           | chr9  | -      | Smad6      | SMAD family member 6                                                                            | 1.71                   | 5.7E-14              |
| NM_001042660        | chr18 | +      | Smad7      | SMAD family member 7                                                                            | 1.26                   | 2.4E-08              |
| NM_019483           | chr3  | +      | Smad9      | SMAD family member 9                                                                            | 1.41                   | 2.5E-04              |
| NM_009234           | chr12 | -      | Sox11      | SRY (sex determining region Y)-box 11                                                           | 6.27                   | 3.9E-28              |
| NM_011577           | chr7  | +      | Tgfb1      | transforming growth factor, beta 1                                                              | 1.46                   | 2.1E-03              |
| NM_001289553        | chr7  | +      | Tgfb11     | transforming growth factor beta 1 induced transcript 1                                          | 2.13                   | 1.7E-08              |
| NM_009367           | chr1  | -      | Tgfb2      | transforming growth factor, beta 2                                                              | 2.79                   | 1.1E-09              |
| NM_009368           | chr12 | -      | Tgfb3      | transforming growth factor, beta 3                                                              | 3.45                   | 2.1E-14              |
| NM_011578           | chr5  | -      | Tgfb3      | transforming growth factor, beta receptor III                                                   | 1.24                   | 8.8E-06              |
| NM_001291124        | chr2  | +      | Tgfb2      | TGF-beta-induced factor homeobox 2                                                              | 2.12                   | 7.7E-04              |
| NM_133784           | chr3  | -      | Vwtr1      | VW domain containing transcription regulator 1                                                  | 1.41                   | 4.4E-13              |

D. DIFFERENTIALLY REGULATED GENES: TGF-beta/BMP SIGNALING  
 MYOCARDIUM, domestic pig, ischemia samples  
 GSE81155

| Transcript/RepeatID | Chr   | Strand | Symbol | healthy vs ischemic logFC | healthy vs ischemic FDR | healthy vs border logFC | healthy vs border FDR | border vs ischemic logFC | border vs ischemic FDR |
|---------------------|-------|--------|--------|---------------------------|-------------------------|-------------------------|-----------------------|--------------------------|------------------------|
| NM_001204765        | chr15 | -      | ACVR2A | -1.21                     | 6.02E-04                | -0.68                   | 2.87E-02              | -0.41                    | 3.66E-01               |
| NM_001204901_1      | chr7  | -      | BMP5   | -3.26                     | 3.56E-08                | -0.91                   | 1.37E-02              | -2.19                    | 7.91E-04               |
| NM_001099926        | chr3  | +      | ADAM17 | 1.26                      | 1.40E-04                | 0.91                    | 5.90E-03              | 0.23                     | 1.00E+00               |
| NM_214048           | chr1  | -      | ARG1   | 7.62                      | 3.27E-48                | 6.91                    | 4.29E-54              | 0.85                     | 3.47E-03               |
| NM_001243889        | chr3  | -      | ASPEN  | -2.87                     | 1.68E-10                | -0.96                   | 4.92E-03              | -1.75                    | 1.10E-03               |
| NM_001195399        | chr17 | +      | BMP2   | 6.38                      | 5.13E-05                | 4.07                    | 5.75E-02              | 2.10                     | 9.33E-03               |
| NM_001101031        | chr1  | -      | BMP4   | 1.01                      | 2.06E-01                | -0.69                   | 5.56E-01              | 1.80                     | 1.56E-02               |
| NM_001105290        | chr17 | -      | BMP7   | 3.94                      | 3.44E-02                | 3.19                    | 4.46E-02              | 0.71                     | 8.17E-01               |
| NM_001204767        | chr14 | +      | BMPR1A | -1.51                     | 1.92E-03                | -0.26                   | 7.42E-01              | -1.14                    | 3.31E-02               |
| NM_214438           | chr18 | -      | CAV1   | -0.85                     | 1.98E-02                | -0.65                   | 3.66E-02              | -0.08                    | 1.00E+00               |
| NM_001123091        | chr18 | -      | CAV2   | -1.06                     | 5.58E-02                | -0.76                   | 8.96E-02              | -0.15                    | 1.00E+00               |
| NM_214214           | chr12 | +      | CCL2   | 3.42                      | 4.68E-12                | 2.58                    | 4.30E-11              | 0.91                     | 3.27E-02               |
| NM_001037964        | chrX  | -      | CITED1 | -2.69                     | 1.60E-02                | -1.34                   | 1.18E-01              | -1.16                    | 8.17E-01               |
| NM_001037965        | chr3  | -      | ID2    | 2.12                      | 1.50E-04                | 2.57                    | 1.75E-14              | -0.34                    | 7.93E-01               |
| NM_001128444        | chr4  | -      | F11R   | 1.25                      | 6.84E-03                | 0.32                    | 7.83E-01              | 0.97                     | 1.16E-01               |
| NM_001123113        | chr7  | +      | FOS    | 2.69                      | 1.89E-16                | 2.56                    | 5.13E-20              | 0.21                     | 8.42E-01               |
| NM_213899           | chr7  | +      | FUT8   | 1.08                      | 1.66E-03                | 1.17                    | 9.88E-06              | 0.04                     | 1.00E+00               |
| NM_214293           | chr14 | +      | GATA4  | -2.19                     | 5.15E-10                | -0.64                   | 7.46E-02              | -1.47                    | 9.47E-10               |
| NM_214328           | chr6  | +      | GATA6  | -3.04                     | 7.04E-12                | -1.26                   | 1.13E-05              | -1.68                    | 1.04E-11               |
| NM_001123124        | chr1  | +      | HIF1A  | 1.08                      | 1.71E-03                | 0.83                    | 5.30E-03              | 0.34                     | 5.67E-01               |
| NM_001190248        | chr14 | +      | HPGD   | -1.31                     | 5.06E-02                | -1.16                   | 1.37E-02              | 0.02                     | 1.00E+00               |
| NM_001134344        | chr4  | -      | KLF10  | 1.06                      | 3.24E-02                | 0.90                    | 1.42E-02              | 0.27                     | 9.09E-01               |
| NM_001129967        | chr8  | +      | LEF1   | 1.88                      | 4.48E-04                | 0.65                    | 4.06E-01              | 1.34                     | 1.81E-02               |
| NM_001114280        | chr1  | -      | MAP3K7 | -0.83                     | 3.78E-02                | -0.39                   | 4.24E-01              | -0.36                    | 6.92E-01               |
| NM_214435           | chr15 | -      | MSTN   | -6.31                     | 2.33E-02                | -2.25                   | 1.53E-01              | -4.41                    | 6.20E-01               |
| NM_001005154        | chr4  | -      | MYC    | 2.19                      | 6.58E-08                | 1.22                    | 1.42E-03              | 1.06                     | 1.60E-03               |
| NM_213736           | chr5  | -      | PDE3A  | -3.60                     | 1.08E-10                | -1.50                   | 4.80E-07              | -1.99                    | 3.48E-12               |
| NM_001123203        | chr17 | -      | PMEP1A | 1.29                      | 4.30E-04                | 1.06                    | 4.08E-04              | 0.33                     | 6.02E-01               |
| NM_001044560        | chr14 | -      | PPP1CC | -0.99                     | 3.67E-02                | -0.09                   | 1.00E+00              | -0.78                    | 1.59E-01               |
| NM_214321           | chr9  | -      | PTGS2  | 3.39                      | 1.36E-13                | 1.99                    | 3.71E-05              | 1.51                     | 6.28E-05               |
| NM_001145750_1      | chr14 | +      | SIRT1  | -2.12                     | 6.87E-03                | -0.17                   | 1.00E+00              | -1.87                    | 2.47E-02               |
| NM_001195510        | chr11 | -      | SMAD9  | 0.74                      | 4.90E-01                | 1.38                    | 4.95E-03              | -0.56                    | 7.34E-01               |
| NM_214015_1         | chr6  | -      | TGFB1  | 1.33                      | 6.64E-04                | 1.09                    | 5.58E-04              | 0.35                     | 6.28E-01               |
| NM_001244536        | chr1  | -      | THBS1  | 1.37                      | 4.02E-03                | 0.93                    | 1.82E-02              | 0.54                     | 2.45E-01               |
| NM_001097436        | chrX  | +      | XIAP   | -1.20                     | 3.77E-03                | -0.76                   | 2.73E-02              | -0.36                    | 7.89E-01               |

\*not significant in the comparison

E. DIFFERENTIALLY REGULATED GENES IN HYPOXIC ENDOTHELIAL CELLS: TGF-beta/BMP PRODUCTION OR SIGNALING  
 HUVEC cells: normoxia, hypoxia  
 GSE94872

| Transcript/RepeatID | Chr   | Strand | Symbol     | notx vs. hypox logFC | notx vs. hypox FDR |
|---------------------|-------|--------|------------|----------------------|--------------------|
| NM_130851           | chr14 | -      | BMP4       | 2.02                 | 1.25E-33           |
| NM_002982           | chr17 | +      | CCL2       | 0.98                 | 1.56E-04           |
| NM_003278           | chr3  | +      | CLEC3B     | 1.74                 | 4.48E-08           |
| NM_000088           | chr17 | -      | COL1A1     | 1.45                 | 2.28E-03           |
| NM_001554           | chr1  | +      | CYR61      | 0.82                 | 1.16E-11           |
| NM_001951           | chr8  | +      | E2F5       | -1.19                | 7.64E-08           |
| NM_001964           | chr5  | +      | EGR1       | -1.82                | 5.74E-04           |
| NR_038170           | chr14 | +      | FUT8       | -1.17                | 3.10E-24           |
| NM_003505           | chr7  | +      | FZD1       | 1.34                 | 8.26E-03           |
| NM_005524           | chr3  | +      | HES1       | 1.04                 | 4.33E-10           |
| NM_001530           | chr14 | +      | HIF1A      | -0.84                | 1.06E-08           |
| NM_022740           | chr7  | -      | HIPK2      | -0.81                | 2.50E-13           |
| NM_001297559        | chr4  | +      | HTRA3      | 0.86                 | 1.65E-05           |
| NM_002228           | chr1  | -      | JUN        | 0.90                 | 6.42E-14           |
| NM_001166265        | chr2  | +      | LTBP1      | -0.93                | 3.38E-13           |
| NM_001177413        | chr2  | +      | RPS27A     | -0.84                | 5.56E-08           |
| NM_001190822        | chr18 | -      | SMAD7      | 0.91                 | 5.32E-11           |
| NM_003244           | chr18 | +      | TGIF1      | 0.77                 | 4.86E-07           |
| NM_138440           | chr16 | +      | VASN       | 1.98                 | 1.56E-05           |
| NM_002166           | chr2  | +      | ID2        | 1.14                 | 1.88E-06           |
| NM_001001557        | chr8  | -      | GDF6/BMP13 | 2.32                 | 2.52E-16           |

### 3. Major Resources Tables

#### Animals

| Species | Vendor or Source    | Background Strain                            | Sex    | Age        |
|---------|---------------------|----------------------------------------------|--------|------------|
| Mice    | Harlan Laboratories | C57/B16                                      | male   | 8-12 weeks |
| Mice    | Envigo              | Hsd:Athymic Nude- <i>Foxn1</i> <sup>nu</sup> | female | 6 weeks    |

#### Animal breeding

|                 | Species | Vendor or Source    | Background Strain | Other Information                                                    |
|-----------------|---------|---------------------|-------------------|----------------------------------------------------------------------|
| Parent - Male   | Mice    | Harlan Laboratories | C57/B16           | breeding in the Lab Animal Unit of the University of Eastern Finland |
| Parent - Female | Mice    | Harlan Laboratories | C57/B16           | breeding in the Lab Animal Unit of the University of Eastern Finland |

#### Antibodies

| Target antigen                | Vendor or Source          | Catalog #   | Working concentration |
|-------------------------------|---------------------------|-------------|-----------------------|
| Alexa 488 chicken anti-rabbit | Thermo Fisher Scientific  | #A21441     | IF: 1/200             |
| Beta-actin                    | Cell Signaling Technology | #4967       | WB: 1/1000            |
| BMP2                          | LS BioSciences            | #LS-C407899 | IF: 1/500             |
| BMP6                          | Thermo Fisher Scientific  | #PA5-78879  | WB: 1/2000            |
| CD31                          | BD Biosciences            | #550274     | IHC: 1/50             |
| Phalloidin Alexa-635          | Thermo Fisher Scientific  | #A2287      | IF: 1/40              |
| pTAZ (Ser89)                  | Cell Signaling Technology | #59971      | WB: 1/1000            |
| Lamin A/C (4C11)              | Cell Signaling Technology | #4777       | WB: 1/1000            |
| VEGF                          | Abcam                     | #52917      | IHC: 1/100            |
| VEGFR2 (55B11)                | Cell Signaling Technology | #2479       | WB: 1/1000, IF: 1/50  |
| YAP/TAZ                       | Cell Signaling Technology | #8418       | WB: 1/1000            |
| TAZ                           | Sigma Aldrich             | # HPA007415 | IHC: 1/100            |

#### Cultured Cells

| Name  | Vendor or Source           | Sex (F, M, or unknown) |
|-------|----------------------------|------------------------|
| HUVEC | Kuopio University Hospital | F                      |
| HPF-C | Promocell                  | unknown                |

#### Primers

| Gene   | Full name                                       | Assay ID       | Vendor |
|--------|-------------------------------------------------|----------------|--------|
| mBmp2  | Bone Morphogenetic Protein 2 (mouse)            | qMmuCIP0030212 | BioRad |
| mBmp4  | Bone Morphogenetic Protein 4 (mouse)            | qMmuCEP0054665 | BioRad |
| mBmp6  | Bone Morphogenetic Protein 6 (mouse)            | qMmuCIP0032439 | BioRad |
| mBmp10 | Bone Morphogenetic Protein 10 (mouse)           | qMmuCIP0028954 | BioRad |
| mGdf2  | Growth Differentiation Factor 2 (BMP9) (mouse)  | qMmuCIP0029928 | BioRad |
| mGdf6  | Growth Differentiation Factor 6 (BMP13) (mouse) | qMmuCIP0031409 | BioRad |



|        |                                                         |                |                          |
|--------|---------------------------------------------------------|----------------|--------------------------|
| mPdgfb | Platelet-Derived Growth Factor Beta Polypeptide (mouse) | Mm00440677_m1  | Thermo Fisher Scientific |
| mPpia  | Peptidylprolyl Isomerase A (mouse)                      | Mm03302254_g1  | Thermo Fisher Scientific |
| mTead2 | TEA Domain Transcription Factor 2 (mouse)               | Mm00449004_m1  | Thermo Fisher Scientific |
| mTgfb1 | Transforming Growth Factor Beta 1 (mouse)               | Mm01178820_m1  | Thermo Fisher Scientific |
| mTgfb3 | Transforming Growth Factor Beta 3 (mouse)               | Mm00436960_m1  | Thermo Fisher Scientific |
| mVegfa | Vascular Endothelial Growth Factor A (mouse)            | Mm01281449_m1  | Thermo Fisher Scientific |
| mWwtr1 | WW Domain Containing Transcription Regulator 1 (mouse)  | Mm01289583_m1  | Thermo Fisher Scientific |
| hAREG  | Amphiregulin (human)                                    | qHsaCIP0039790 | BioRad                   |
| hB2M   | Beta-2-Microglobulin (human)                            | qHsaCIP0029872 | BioRad                   |
| hBMP2  | Bone Morphogenetic Protein 2 (human)                    | qHsaCIP0029912 | BioRad                   |
| hBMP4  | Bone Morphogenetic Protein 4 (human)                    | qHsaCEP0024625 | BioRad                   |
| hBMP6  | Bone Morphogenetic Protein 6 (human)                    | qHsaCIP0031092 | BioRad                   |
| hCTGF  | Connective Tissue Growth Factor (human)                 | qHsaCEP0024255 | BioRad                   |
| hCYR61 | Cysteine Rich Angiogenic Inducer 61 (human)             | qHsaCEP0024230 | BioRad                   |
| hDLL4  | Delta-Like 4 (human)                                    | qHsaCEP0051500 | BioRad                   |
| hFLT1  | Fms Related Tyrosine Kinase 1 (VEGFR1) (human)          | Hs01052961_m1  | Thermo Fisher Scientific |
| hKDR   | Kinase Insert Domain Receptor (VEGFR2) (human)          | Hs00911700_m1  | Thermo Fisher Scientific |
| hNRP1  | Neuropilin 1 (human)                                    | Hs00826128_m1  | Thermo Fisher Scientific |
| hNRP2  | Neuropilin 2 (human)                                    | Hs00187290_m1  | Thermo Fisher Scientific |
| hSNAI2 | Snail Family Transcriptional Repressor 2 (human)        | qHsaCIP0027976 | BioRad                   |
| hTEAD2 | TEA Domain Transcription Factor 2 (human)               | qHsaCIP0030996 | BioRad                   |
| hVEGFA | Vascular Endothelial Growth Factor A (human)            | Hs00900055_m1  | Thermo Fisher Scientific |
| hWWTR1 | WW Domain Containing Transcription Regulator 1 (human)  | qHsaCEP0049274 | BioRad                   |

**Recombinant proteins**

| <b>Protein</b> | <b>Vendor or Source</b> | <b>Catalog #</b> | <b>Working concentration</b> |
|----------------|-------------------------|------------------|------------------------------|
| BMP2           | R&D Systems             | #355-BM-010      | 100 ng/ml                    |
| BMP4           | R&D Systems             | #314-BP-010      | 100 ng/ml                    |
| BMP6           | R&D Systems             | #507-BP-020      | 100 ng/ml                    |
| VEGF           | R&D Systems             | #293-VE-010      | 100 ng/ml                    |

**siRNAs**

| <b>siRNA</b>             | <b>Vendor or Source</b>  | <b>Catalog #</b> | <b>Working concentration</b> |
|--------------------------|--------------------------|------------------|------------------------------|
| Negative Control 2 siRNA | Thermo Fisher Scientific | #4390846         | 5/10 nM                      |
| siTAZ, s24788            | Thermo Fisher Scientific | #4392420         | 5/10 nM                      |
| siBMP2, s2020            | Thermo Fisher Scientific | #4392420         | 5 nM                         |
| siBMP6, s2034            | Thermo Fisher Scientific | #4392420         | 5 nM                         |

#### **4. SUPPLEMENTAL REFERENCES:**

1. Wang D, Garcia-Bassets I, Benner C, et al. Reprogramming transcription by distinct classes of enhancers functionally defined by eRNA. *Nature*. 2011;474(7351):390-394.
2. Niskanen H, Tuszynska I, Zaborowski R, et al. Endothelial cell differentiation is encompassed by changes in long range interactions between inactive chromatin regions. *Nucleic Acids Res*. 2018;46(4):1724-1740.
3. Robinson MD, McCarthy DJ, Smyth GK. edgeR: A bioconductor package for differential expression analysis of digital gene expression data. *Bioinformatics*. 2010;26(1):139-140.
