# Supplementary material for: BMP6/TAZ-Hippo signaling modulates angiogenesis and endothelial cell response to VEGF
Source: Springer Nature journal article supplement (doi:10.1007/s10456-020-09748-4), 2020-10-06

# Suppl. Fig. 1

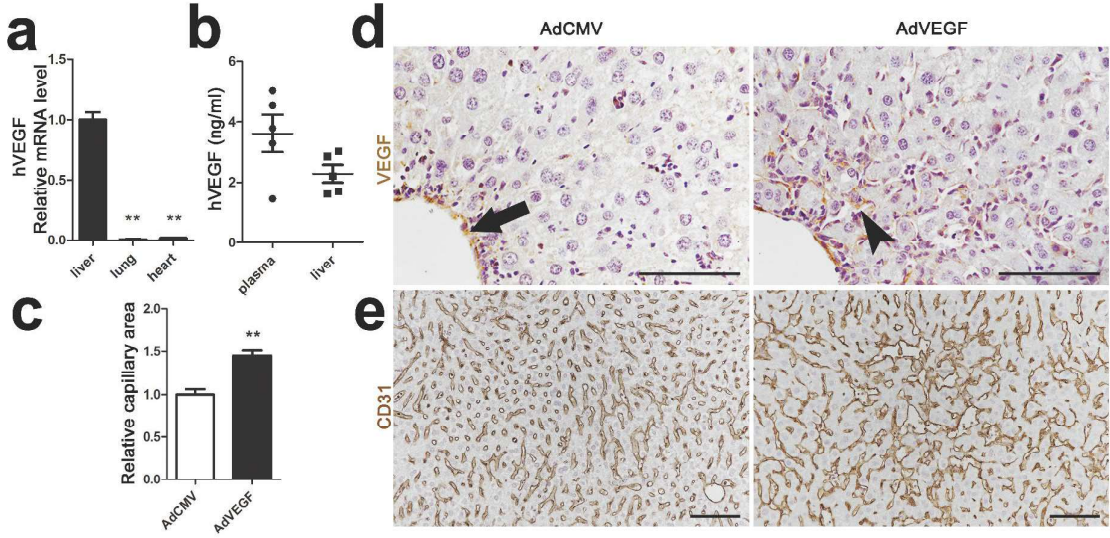

# Suppl. Fig. 2

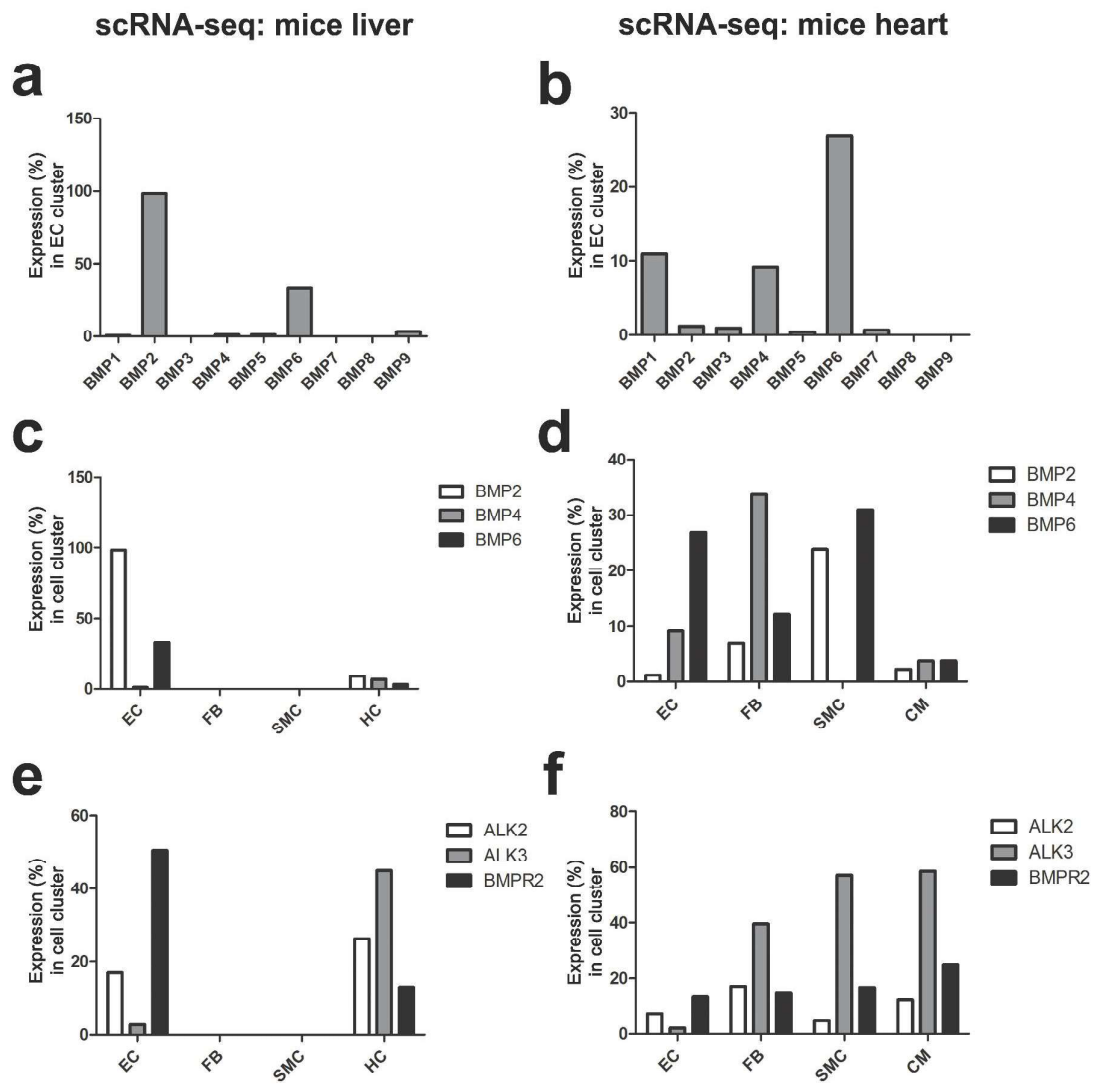

# Suppl. Fig. 3

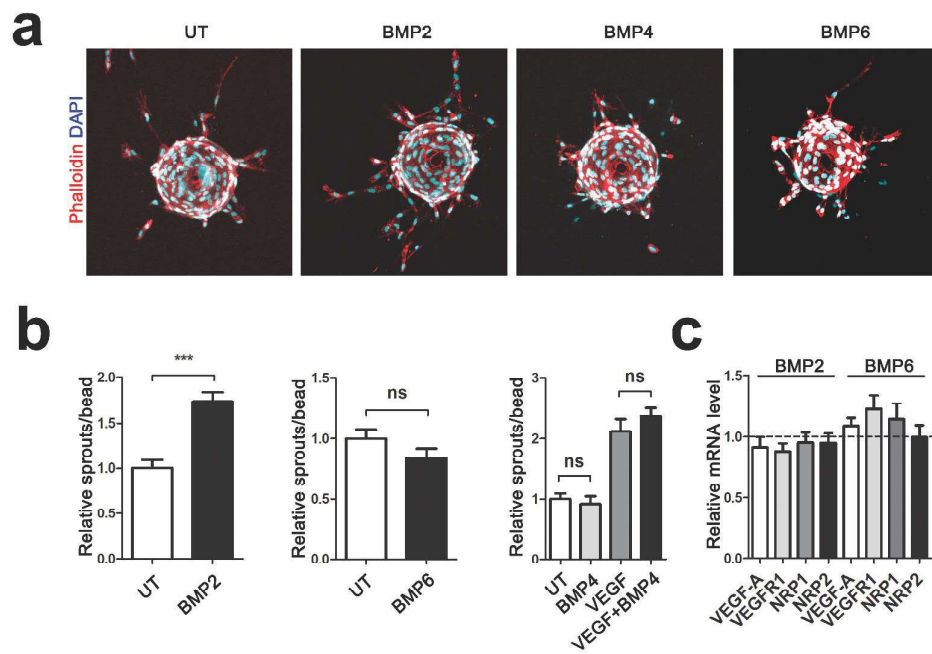

# Suppl. Fig. 4

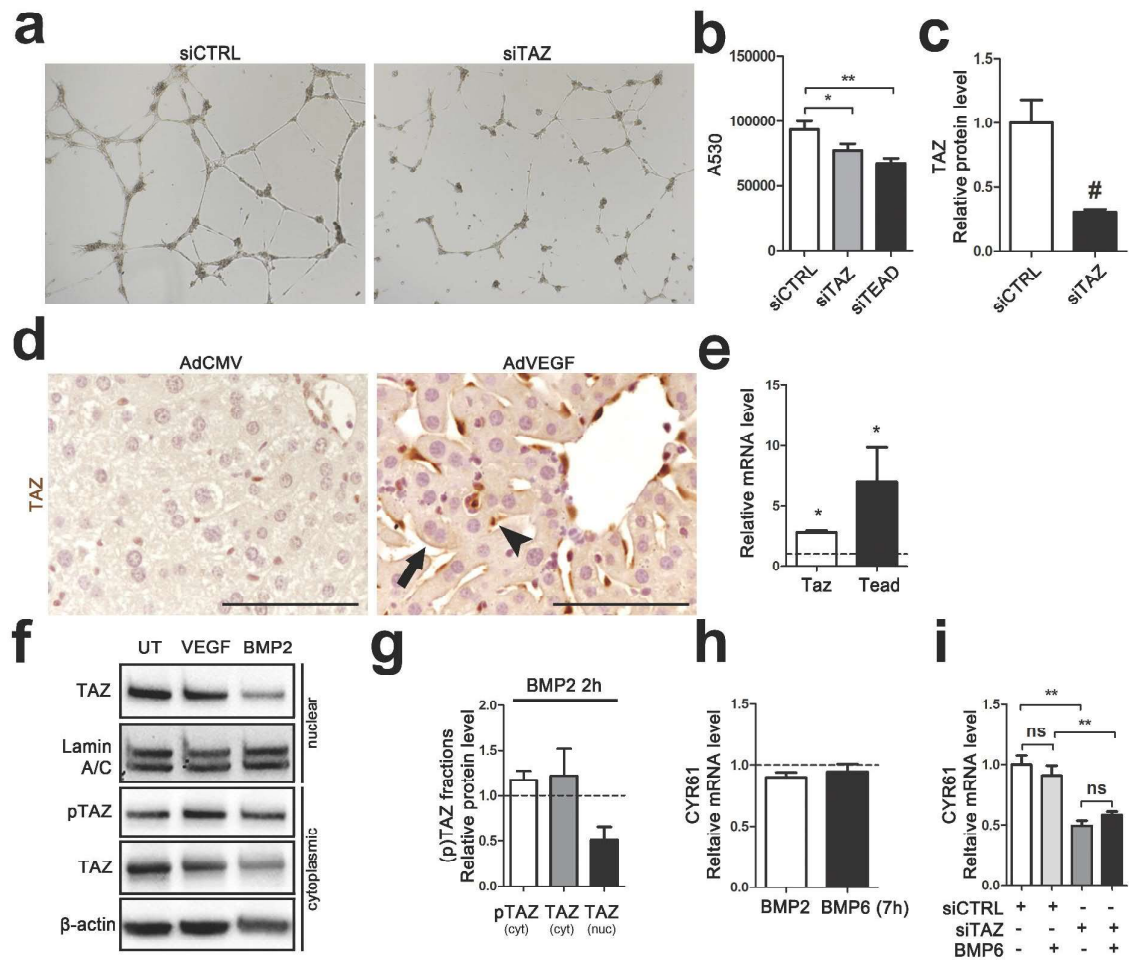

Supplement: MOESM2 [file 18453862]
